# Supplementary material
Source: PubMed Central journal article supplement (PMC3790466)

## ASSOCIATED CONTENT

### Supporting Information

#### Supplemental Figure 1

Uncorrected and non-normalized BLI traces of prepore to pore transitions as the pH decreases in MES buffers. The PA loading onto the BLI tip for pH 6.0-6.75 were larger than PA loads at pH 5.5 and pH 5.0. Note that the initial kinetic traces become increasingly more rapid within the first 10 sec as the pH drops from pH 6.5 to pH 5.0.

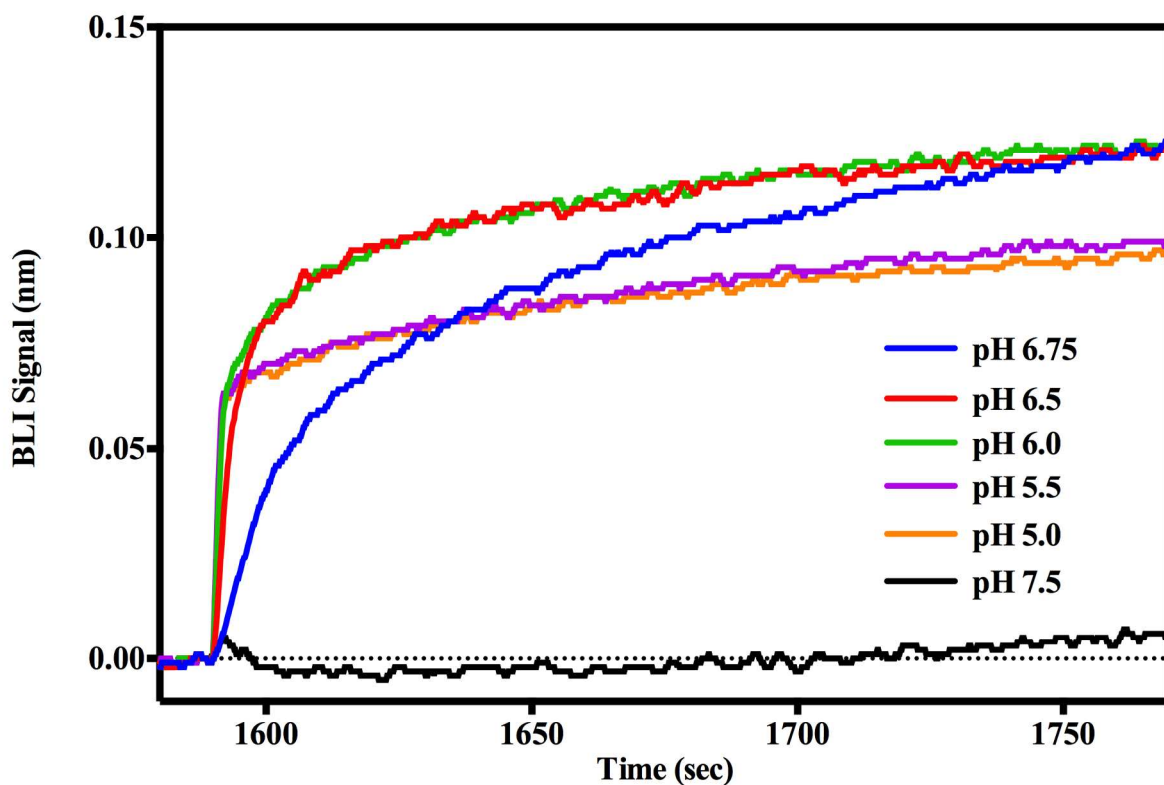

## Supplemental figure 2

Fitting the BLI traces obtained from either the 8 channel octet (A) or the single channel Blitz (B) to obtain kinetic constants for PA transition. The fits are shown as black dotted traces. The first 10 seconds of the data and the fits that correspond to the initial fast phase are shown in the inset. Also note that the time scales are different between the two traces (compiled rate data listed in Table 1).

A

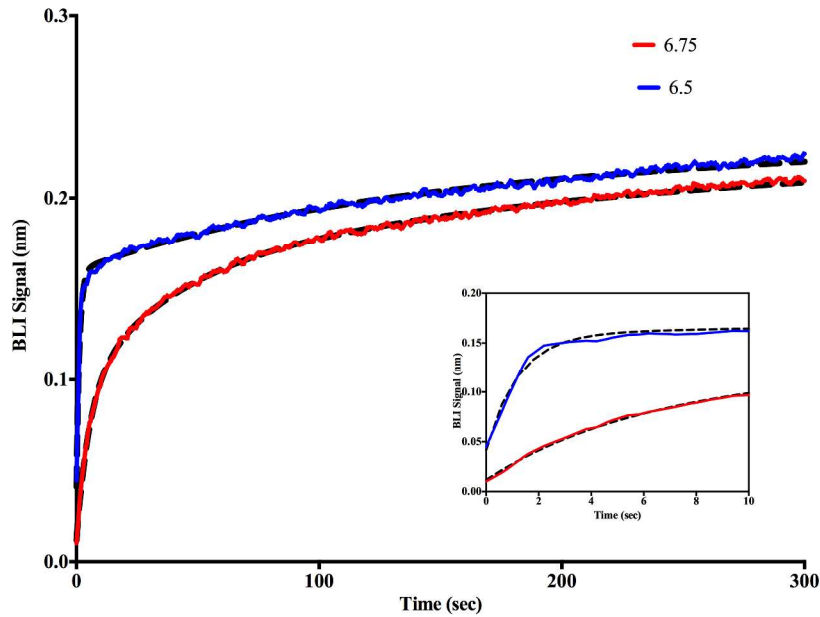

B

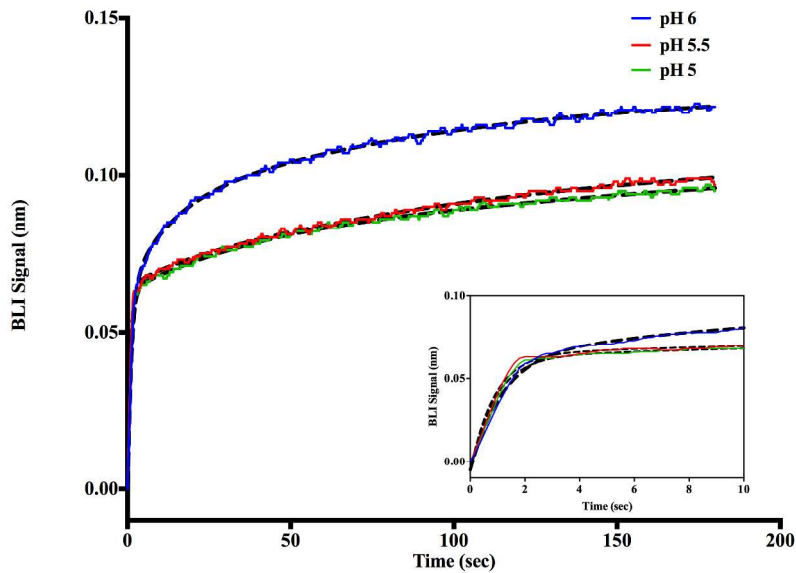

### Supplemental Figure 3

Uncorrected SPR sensogram of the prepore and CMG2 loading followed by the prepore to pore transition in the presence of CMG2 receptor at pH 5.5. The corrected signal for the pore transition is much smaller than the signals observed in the absence of the receptor (compare corrected SPR traces Figure 2A pH 5.5 with Figure 6A).

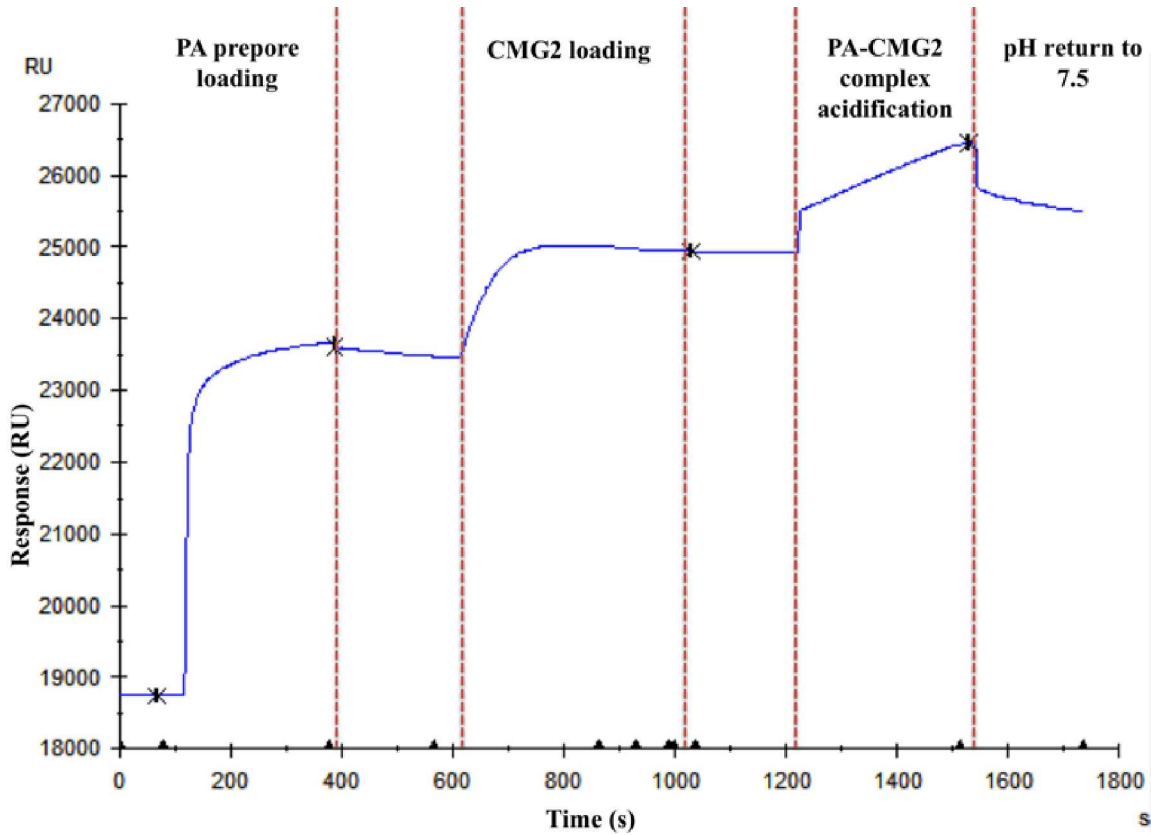

Supplement: NIHMS518424-supplement-1_si_001.pdf [file NIHMS518424-supplement-1_si_001.pdf]
